# Supplementary material for: Chromogenic ‘naked eye’ and fluorogenic ‘turn on’ sensor for mercury metal ion using thiophene-based Schiff base
Source: Royal Society of Chemistry journal article supplement (doi:10.1039/c5ra11043b), 2015-01-01
Supplement: c5ra11043b1.pdf [file c5ra11043b1.pdf]

## Electronic Supplementary Information for

### Chromogenic 'naked eye' and fluorogenic 'turn on' sensor for mercury metal ion using thiophene based Schiff base

Divya Singhal, Neha Gupta, Ashok Kumar Singh\*

Department of Chemistry, Indian Institute of Technology-Roorkee,  
Roorkee-247667, India

\*E-mail: akscyfcy@iitr.ernet.in

#### Table of Contents:

**Fig. S1** UV-Vis spectra of of Probe 1.

**Fig. S2** UVVis spectra of of Probe 2.

**Fig. S3**  $^1\text{H}$  NMR spectrum of Probe 1.

**Fig. S4**  $^{13}\text{C}$  NMR spectrum of Probe 1.

**Fig. S5**  $^1\text{H}$  NMR spectrum of Probe 2.

**Fig. S6**  $^{13}\text{C}$  NMR spectrum of Probe 2.

**Fig. S7** MALDI-TOF positive ion mode mass spectrum of Probe 1 in presence  $\text{Hg}^{2+}$  ions using HABA matrix.

**Fig. S8** Optimized structure of Probe 2 and HOMO-LUMO diagram.

**Fig. S9** Cyclic voltammograms of Probe 2.

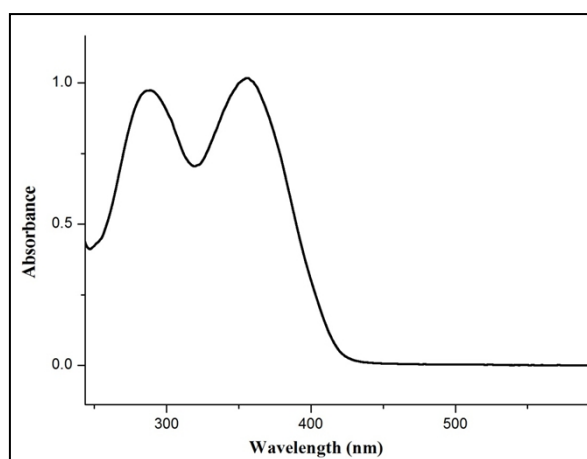

**Fig.S1** UV-Vis spectra of of Probe 1.

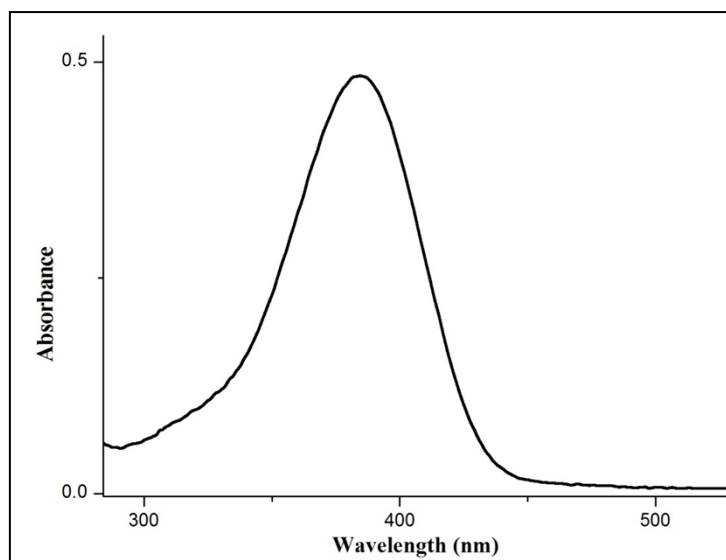

**Fig. S2** UV-Vis spectra of of Probe 2.

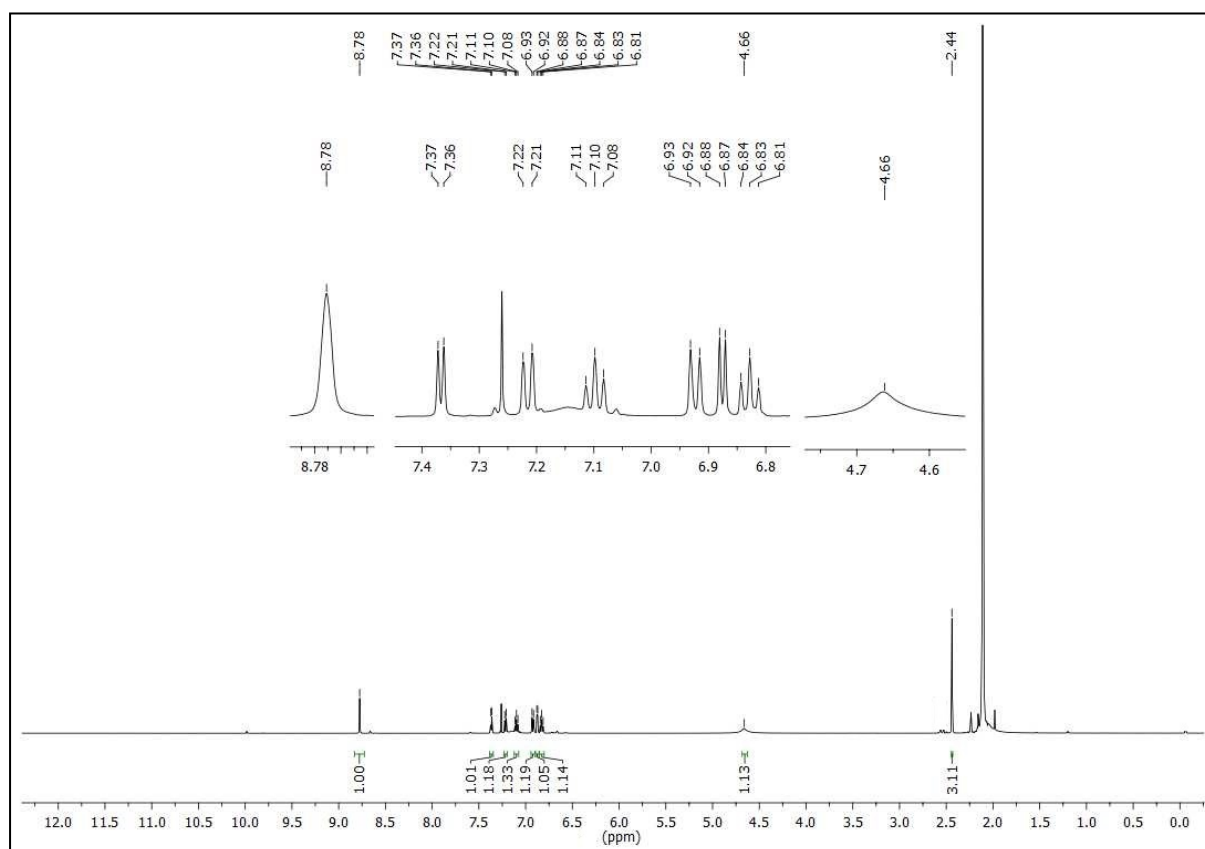

**Fig.S3** <sup>1</sup>H NMR spectrum of Probe 1.

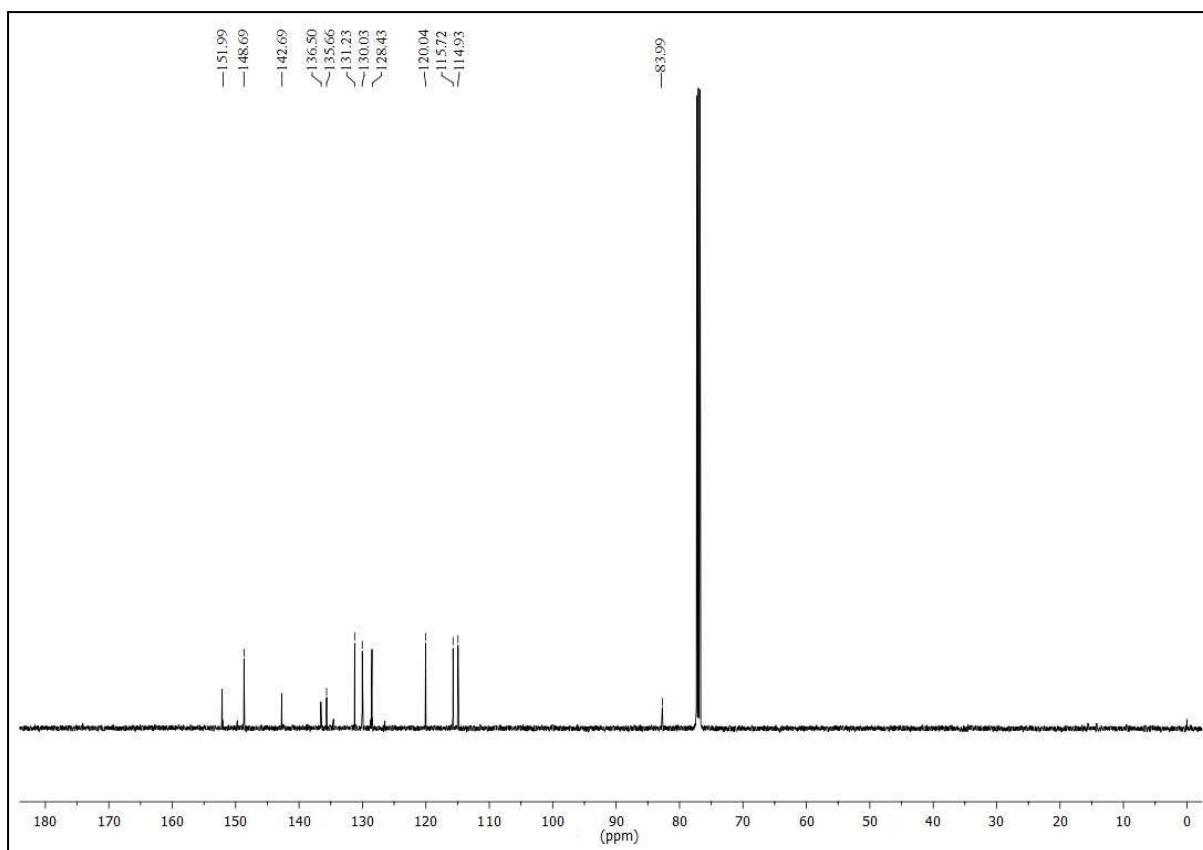

Fig. S4  $^{13}\text{C}$  NMR spectrum of Probe 1.

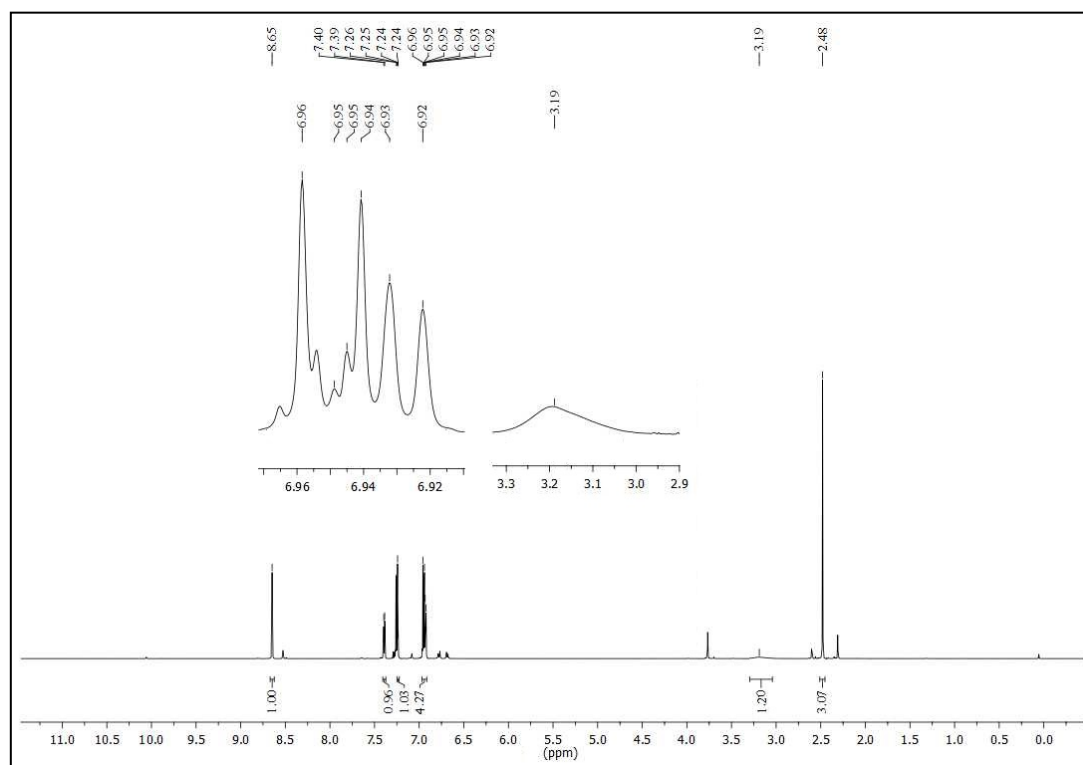

Fig. S5  $^1\text{H}$  NMR spectrum of Probe 2.

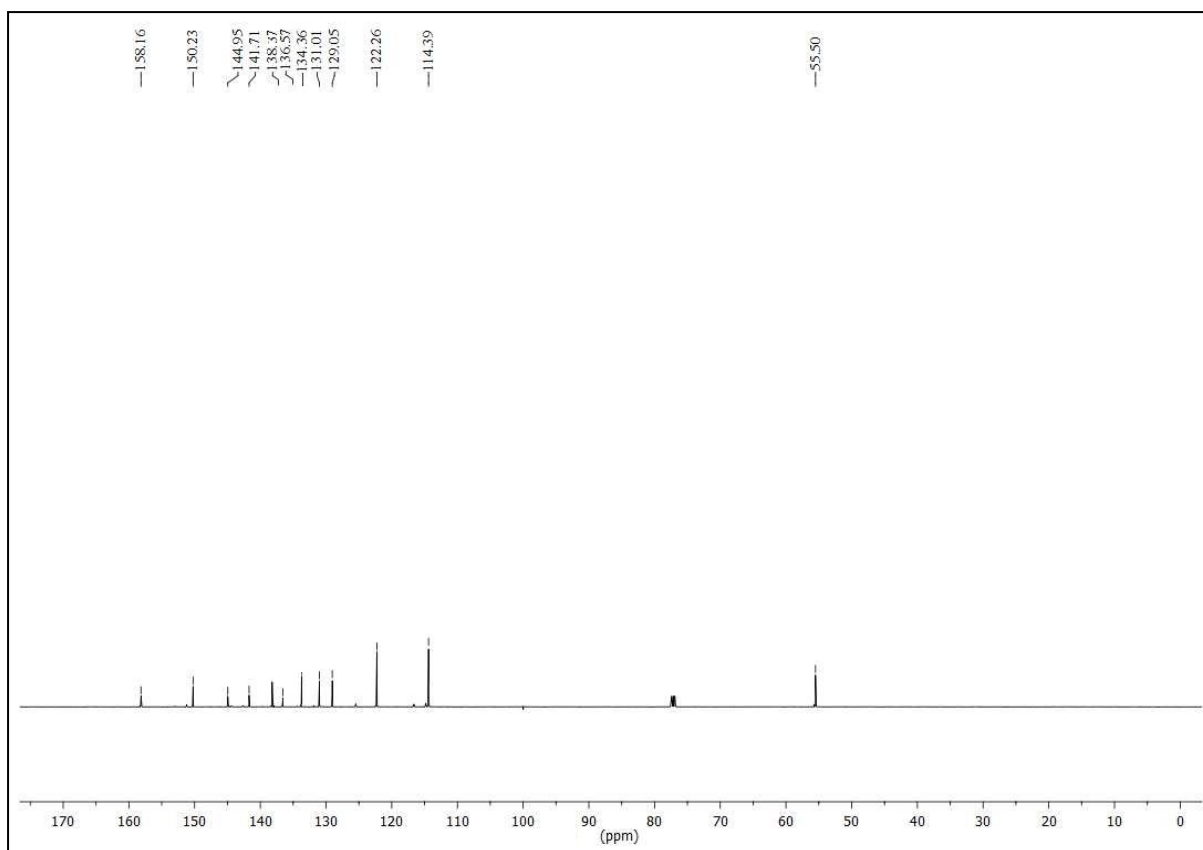

**Fig. S6**  $^{13}\text{C}$  NMR spectrum of Probe 2.

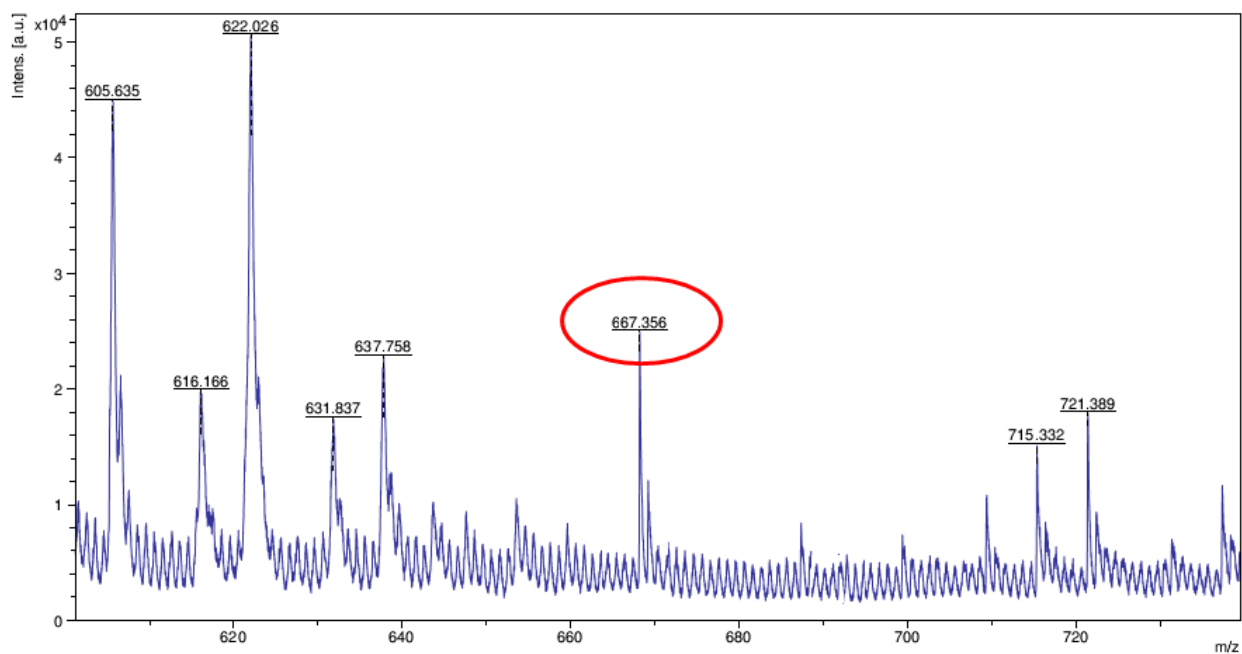

**Fig. S7** MALDI-TOF positive ion mode mass spectrum of Probe 1 in presence  $\text{Hg}^{2+}$  ions using HABA matrix.

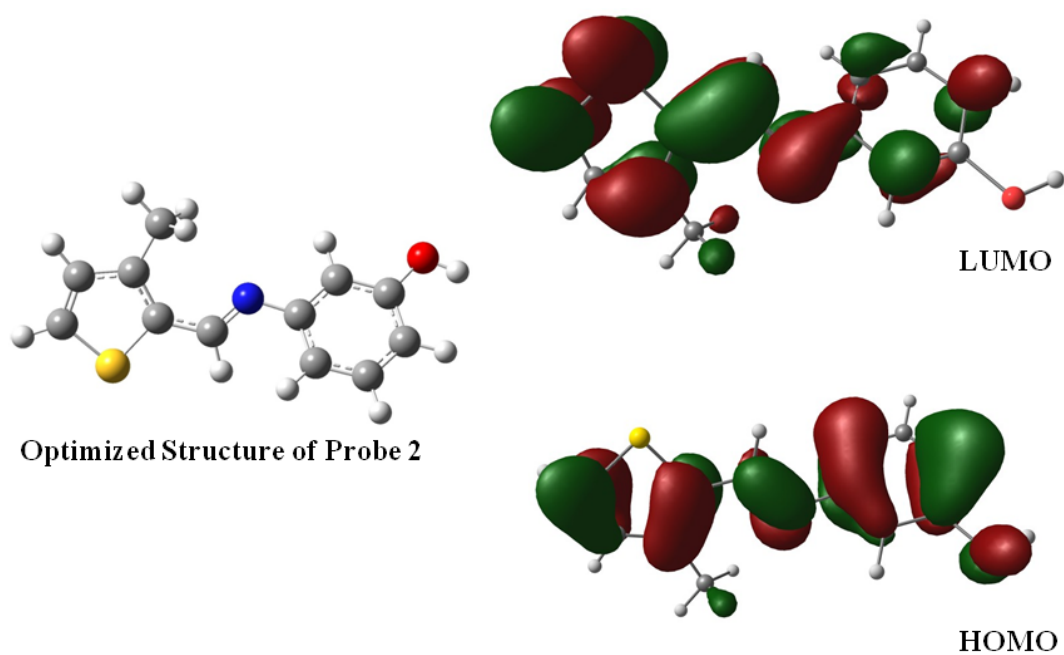

Fig. S8 Optimized structure of Probe 2 and HOMO-LUMO diagram.

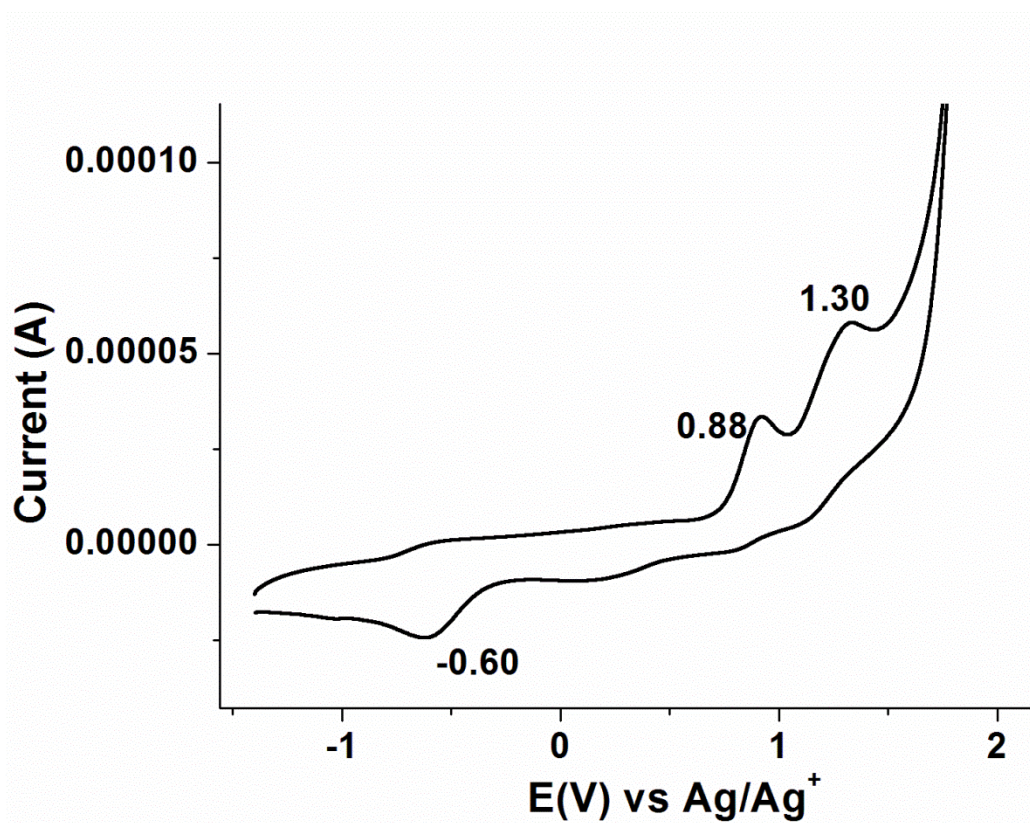

Fig. S9 Cyclic voltammograms of Probe 2.
